# Supplementary material
Source: Royal Society of Chemistry journal article supplement (doi:10.1039/d6py00184j)
Supplement: d6py00184j1.pdf [file d6py00184j1.pdf]

## Supporting information

### Thermoset meets Thermoplastic: Upcycling PLA in Digital Light Processing 3D Printing of Dynamic Thiol–Ene Composites

Szymon Gaca,<sup>ab</sup> Daniel Bautista-Anguís,<sup>a,b</sup> Milena Gleirscher,<sup>a,b</sup> Michele Bonacina,<sup>c</sup> Yves Leterrier,<sup>c</sup> Véronique Michaud,<sup>c</sup> and Sandra Schlögl<sup>a,b,\*</sup>

<sup>a</sup>Polymer Competence Center Leoben GmbH (PCCL), Sauraugasse 1, 8700 Leoben, Austria

<sup>b</sup>Chair of Chemistry of Polymeric Materials, Technical University of Leoben (MUL), Otto Glöckel-Straße 2/IV, 8700 Leoben, Austria

<sup>c</sup>Laboratory for Processing of Advanced Composites (LPAC), Institute of Materials, École Polytechnique Fédérale de Lausanne (EPFL), Lausanne, Switzerland

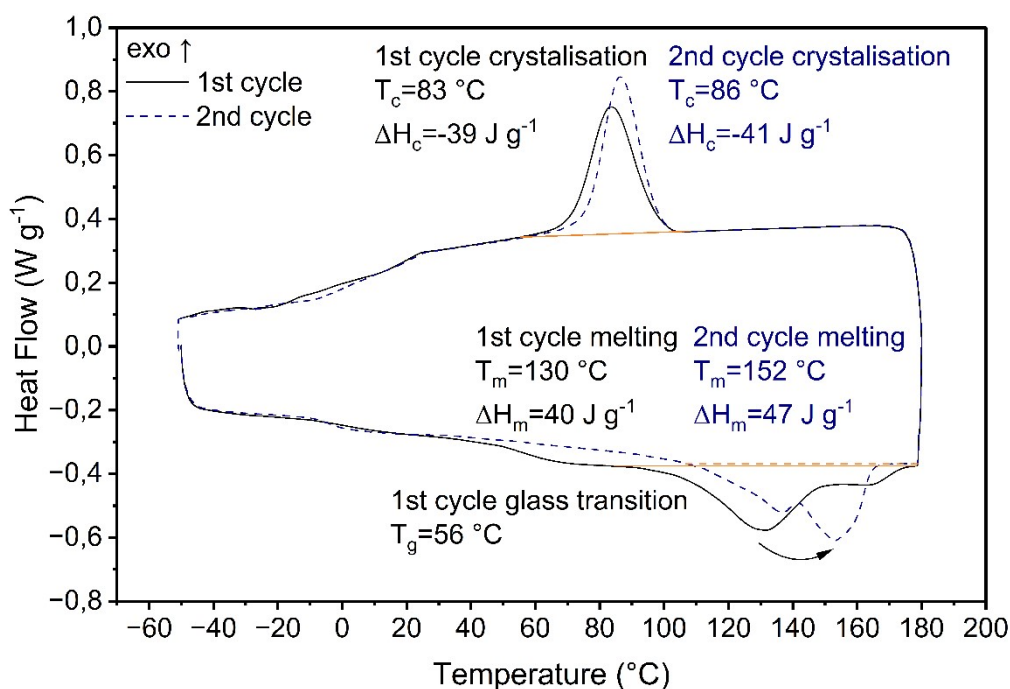

Figure S1 DSC curve of neat PLA filler obtained over two consecutive heating–cooling cycles (10 °C min<sup>-1</sup>, N<sub>2</sub> atmosphere).

Table S1 Formulas and values used to calculate PLA density

|                                                    |                                                            |                      |        |     |                              |                                                                                |                          |            |                          |
|----------------------------------------------------|------------------------------------------------------------|----------------------|--------|-----|------------------------------|--------------------------------------------------------------------------------|--------------------------|------------|--------------------------|
| Degree of crystallinity                            | $\chi_c = \frac{\Delta H_m - \Delta H_{cc}}{\Delta H_m^0}$ |                      |        | 43% | Density                      | $\rho = \left( \frac{\chi_c}{\rho_c} + \frac{1 - \chi_c}{\rho_a} \right)^{-1}$ |                          |            | 1,266 g cm <sup>-3</sup> |
| Parameter                                          | Short                                                      | Value                | Source |     | Parameter                    | Short                                                                          | Value                    | Source     |                          |
| Melting enthalpy                                   | $\Delta H_m$                                               | 40 J g <sup>-1</sup> | DSC    |     | Degree of crystallinity      | $\chi_c$                                                                       | 43%                      | Calculated |                          |
| Cold crystallisation enthalpy                      | $\Delta H_{cc}$                                            | 0 J g <sup>-1</sup>  | DSC    |     | Density of crystalline phase | $\rho_c$                                                                       | 1,290 g cm <sup>-3</sup> | [2]        |                          |
| Reference melting enthalpy of 100% crystalline PLA | $\Delta H_m^0$                                             | 93 J g <sup>-1</sup> | [1]    |     | Density of amorphous phase   | $\rho_a$                                                                       | 1,248 g cm <sup>-3</sup> | [3]        |                          |

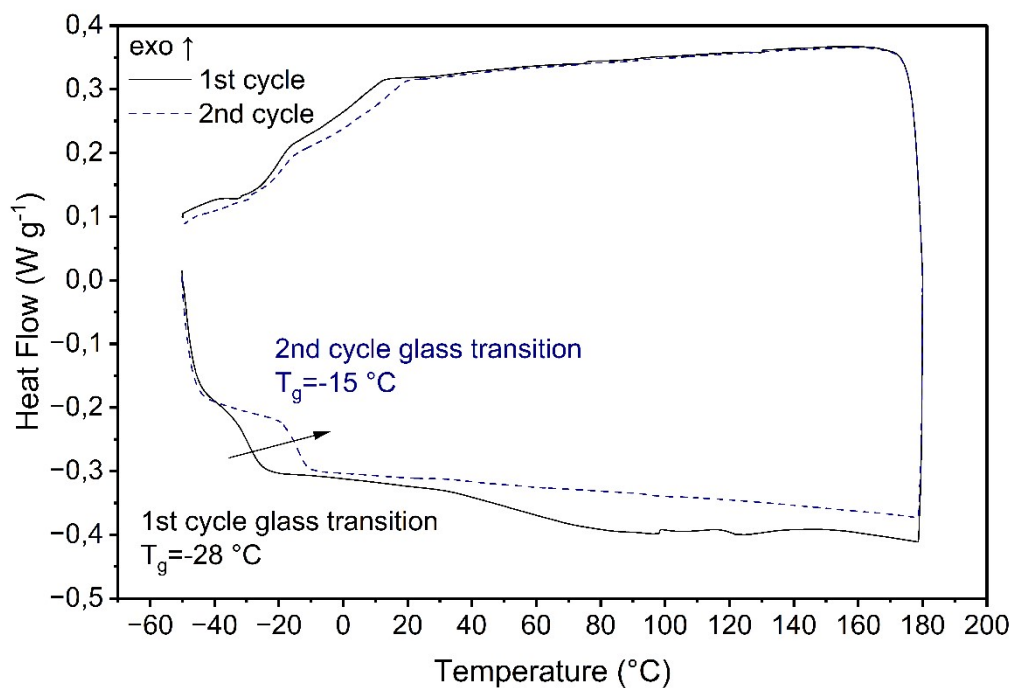

Figure S2 DSC curve of the pristine photopolymer obtained over two consecutive heating-cooling cycles ( $10^{\circ}\text{C min}^{-1}$ ,  $\text{N}_2$  atmosphere).

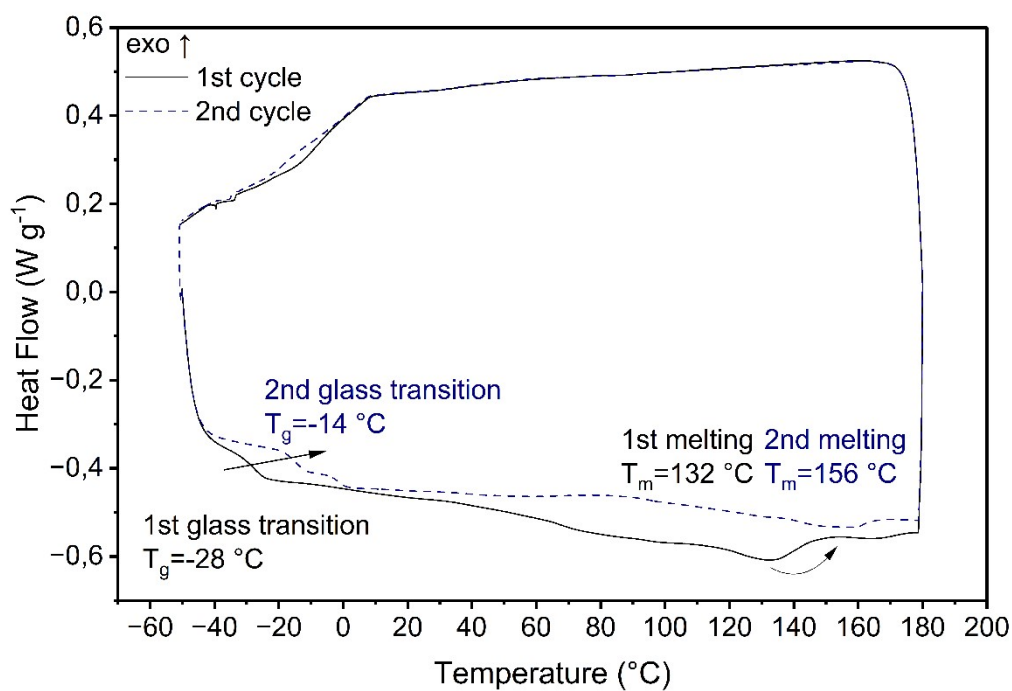

Figure S3 DSC curve of PLA30% composite obtained over two consecutive heating-cooling cycles ( $10^{\circ}\text{C min}^{-1}$ ,  $\text{N}_2$  atmosphere).

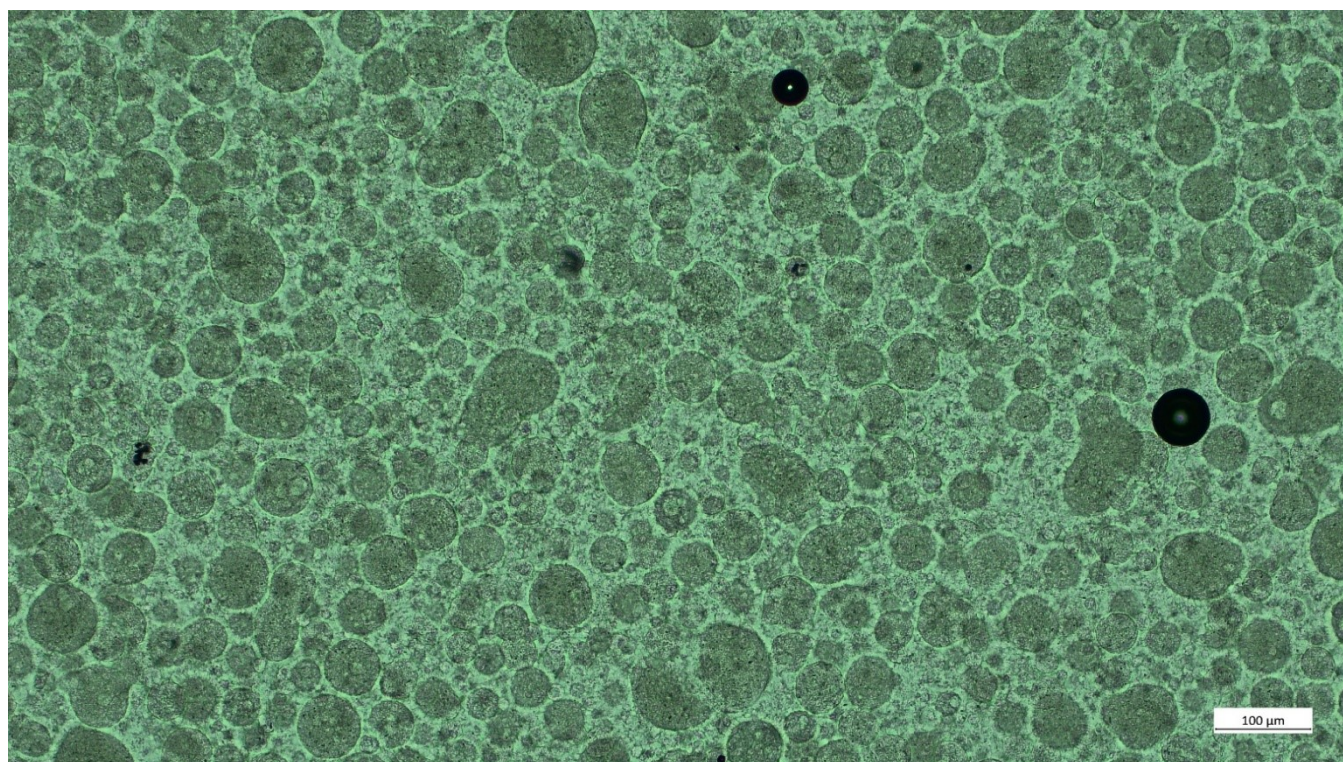

Figure S4 Microscopic image of PLA filler distributed in PLA30 resin.

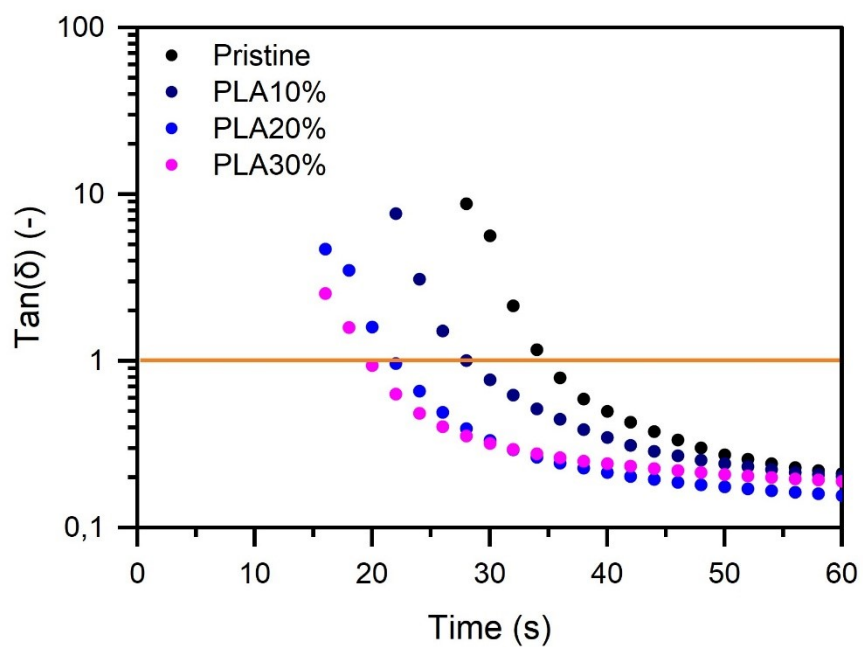

Figure S5 Change of loss factor  $\tan(\delta)$  during light irradiation obtained from photo-rheology. The gel point was determined for the time at which the loss factor value was 1.

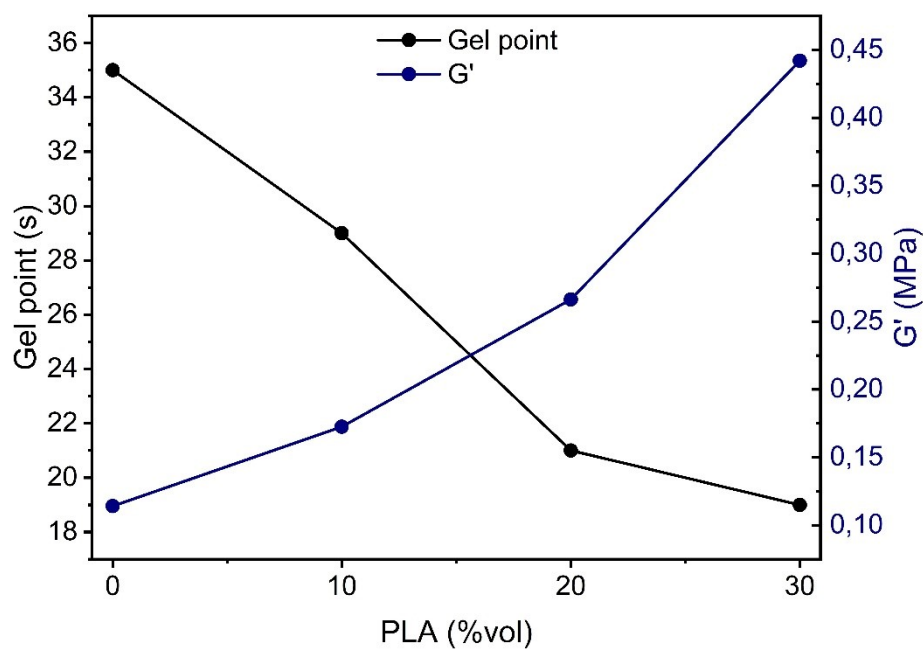

Figure S6 Gel point and maximum storage modulus  $G'$  obtained from photo-rheology as a function of filler volume.

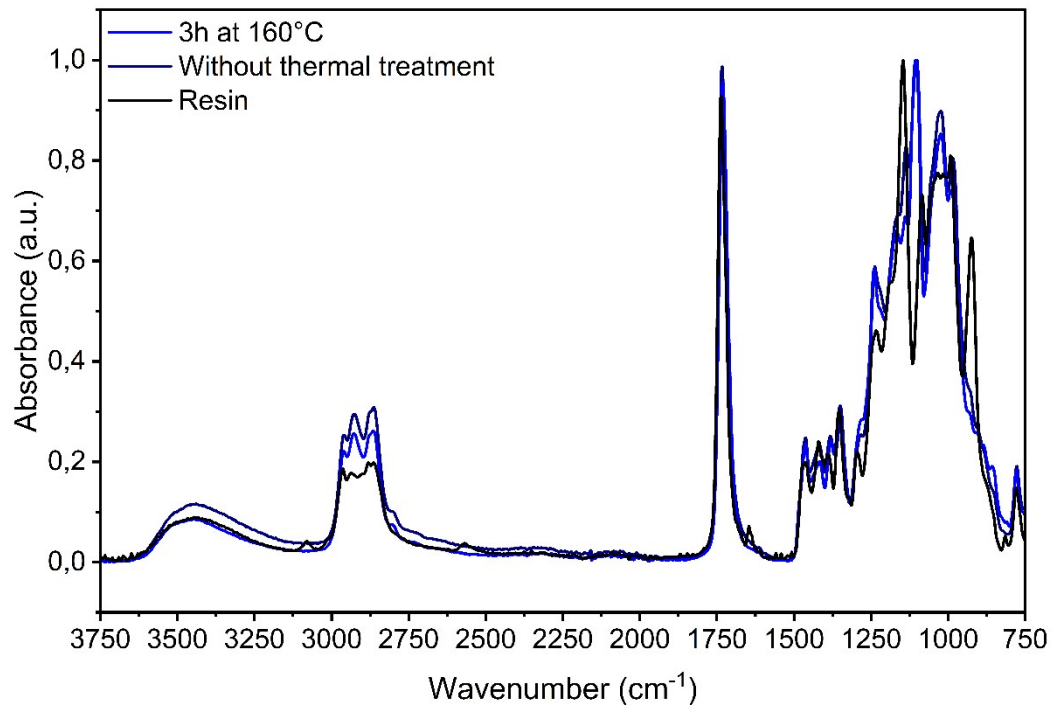

Figure S7 FTIR spectra showing changes in characteristic signals during photopolymerisation and post-baking (full range).

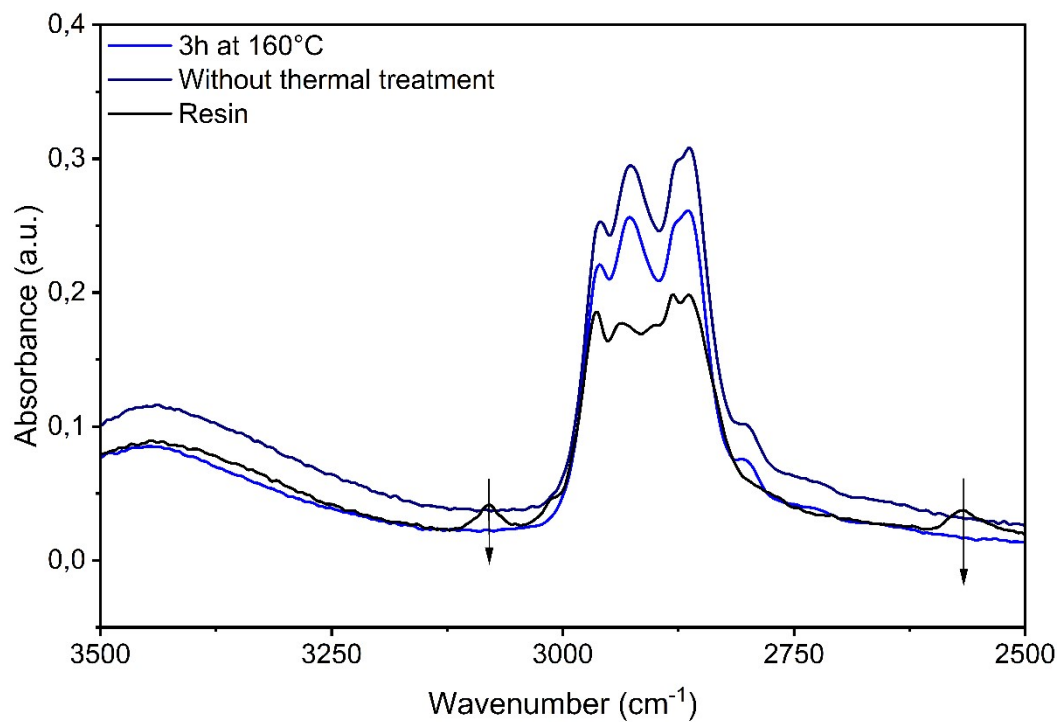

Figure S8 FTIR spectra showing changes in characteristic signals during photopolymerisation and post-baking (range 3500-2500 cm<sup>-1</sup>).

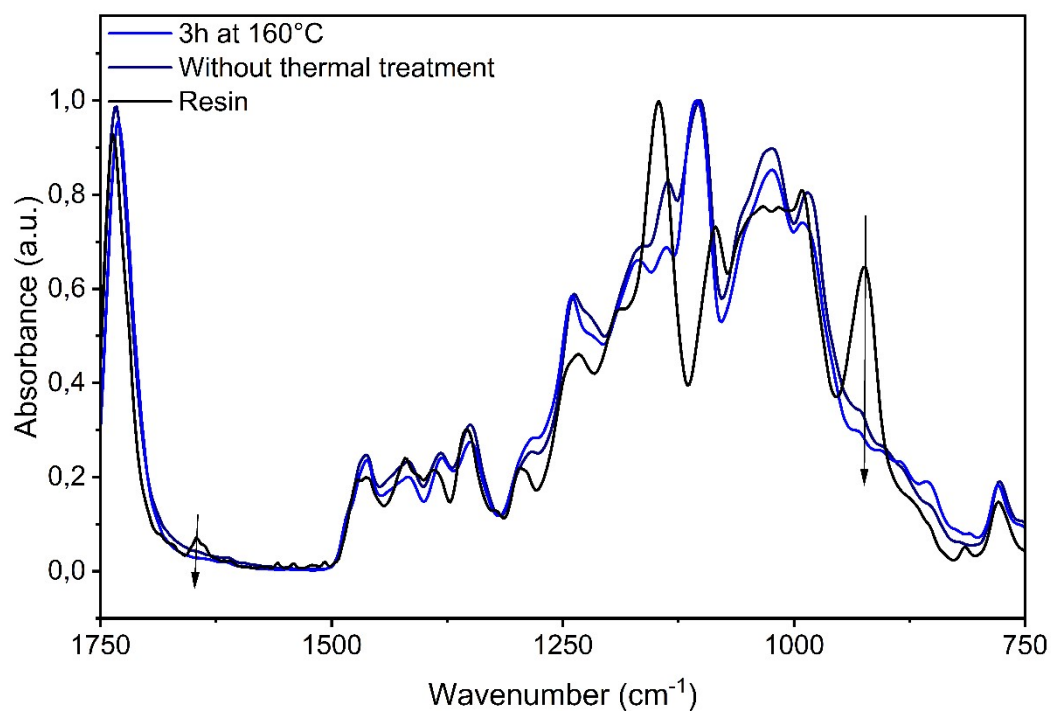

Figure S9 FTIR spectra showing changes in characteristic signals during photopolymerisation and post-baking (range 1750-750 cm<sup>-1</sup>).

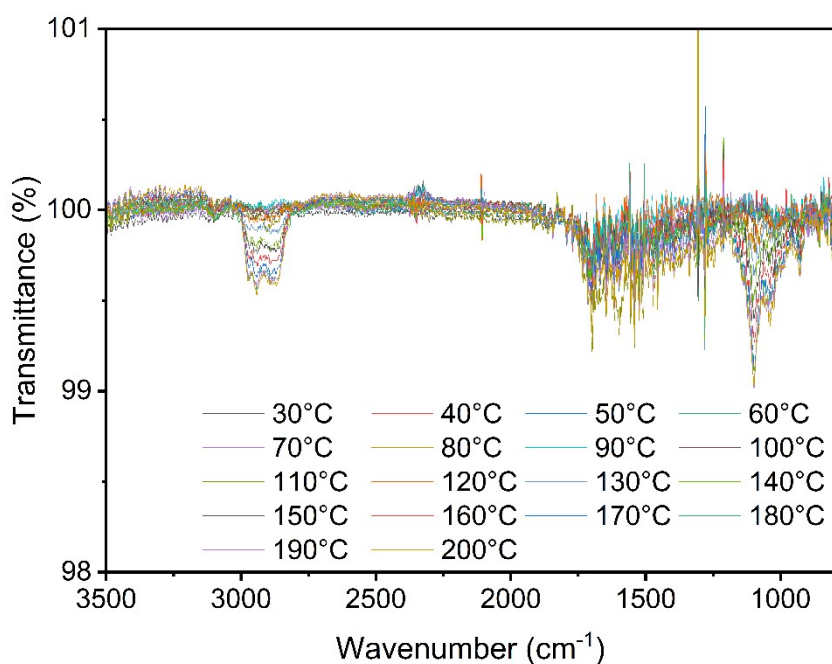

Figure S10 FTIR spectra of the evolved gases at various temperatures during uncatylsed pristine sample post-baking (range 3500-750 cm<sup>-1</sup>).

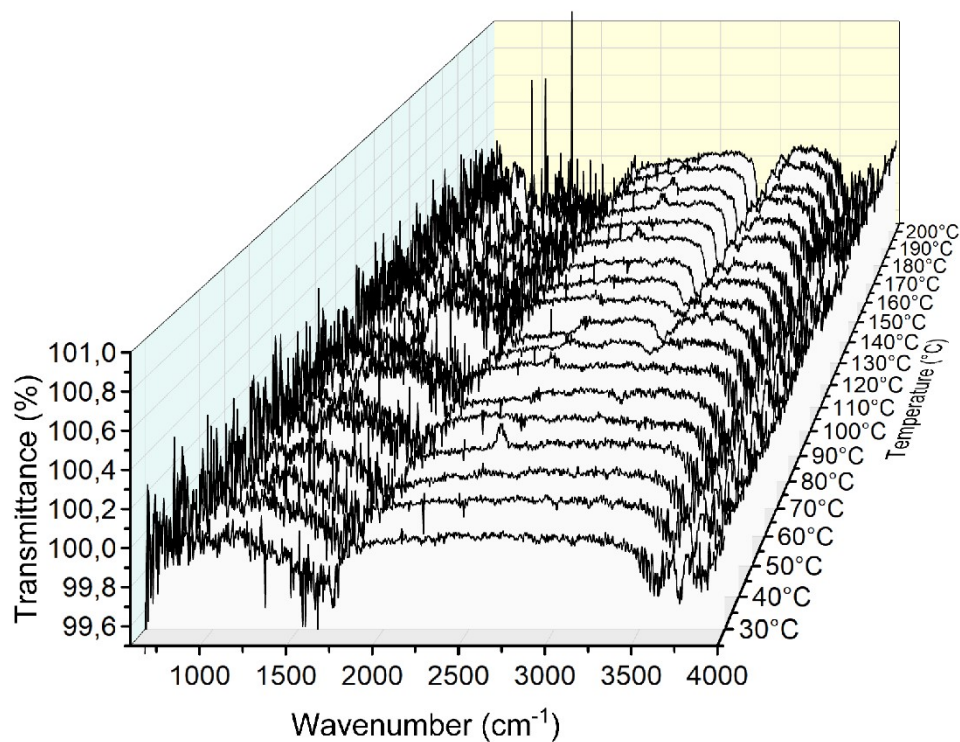

Figure S11 FTIR spectra of the evolved gases at various temperatures during uncatylsed pristine sample post-baking (range 4000-600 cm<sup>-1</sup>).

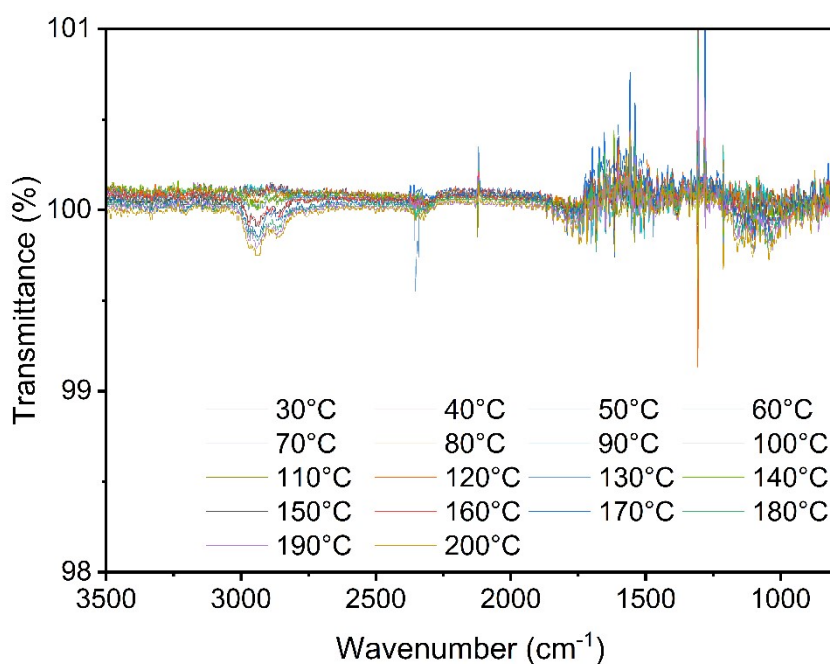

Figure S12 FTIR spectra of the evolved gases at various temperatures during catalysed pristine sample post-baking (range 3500-750  $\text{cm}^{-1}$ ).

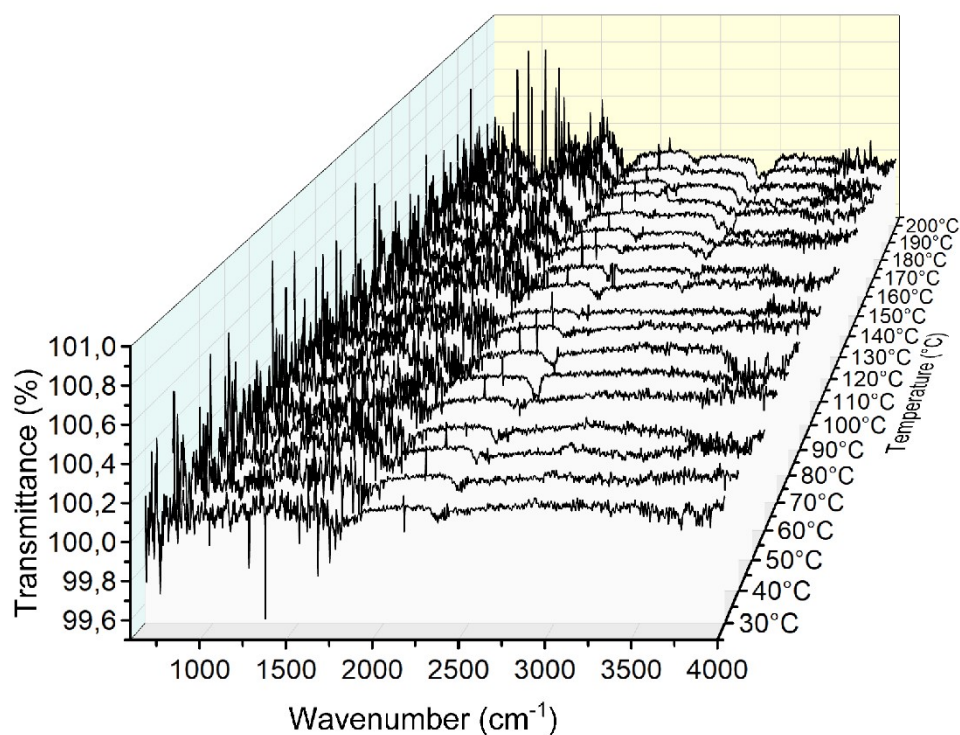

Figure S13 FTIR spectra of the evolved gases at various temperatures during catalysed pristine sample post-baking (range 4000-600  $\text{cm}^{-1}$ ).

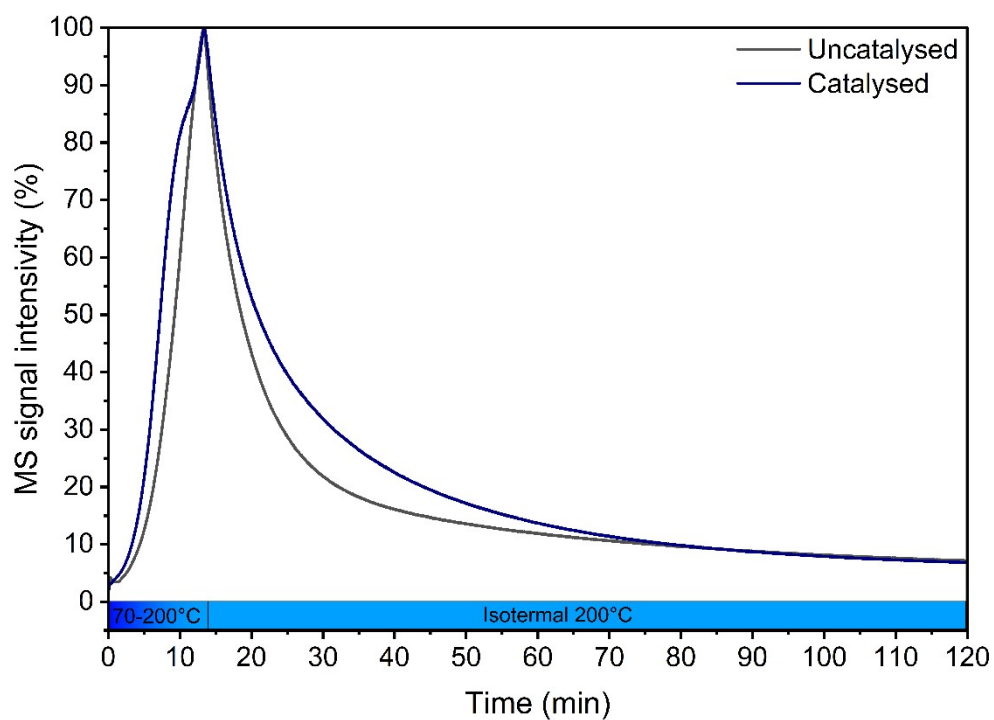

Figure S14 Mass spectrometry signal intensity as a function of time during sample thermal treatment.

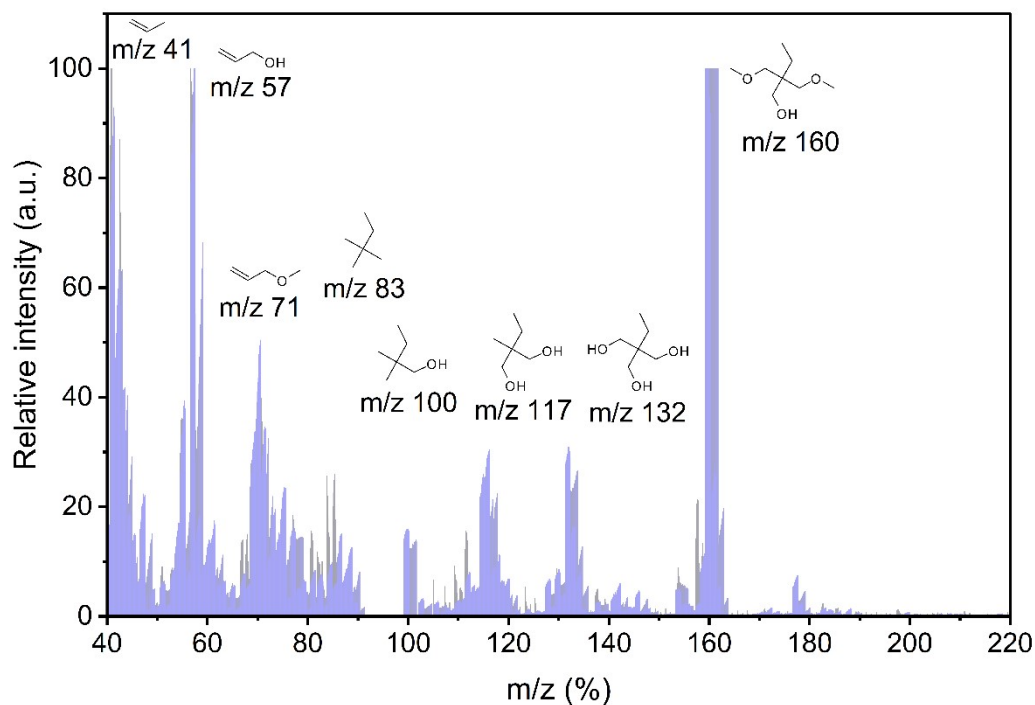

Figure S15 Proposed structures for MS peaks obtained during thermal treatment of the uncatalysed pristine sample.

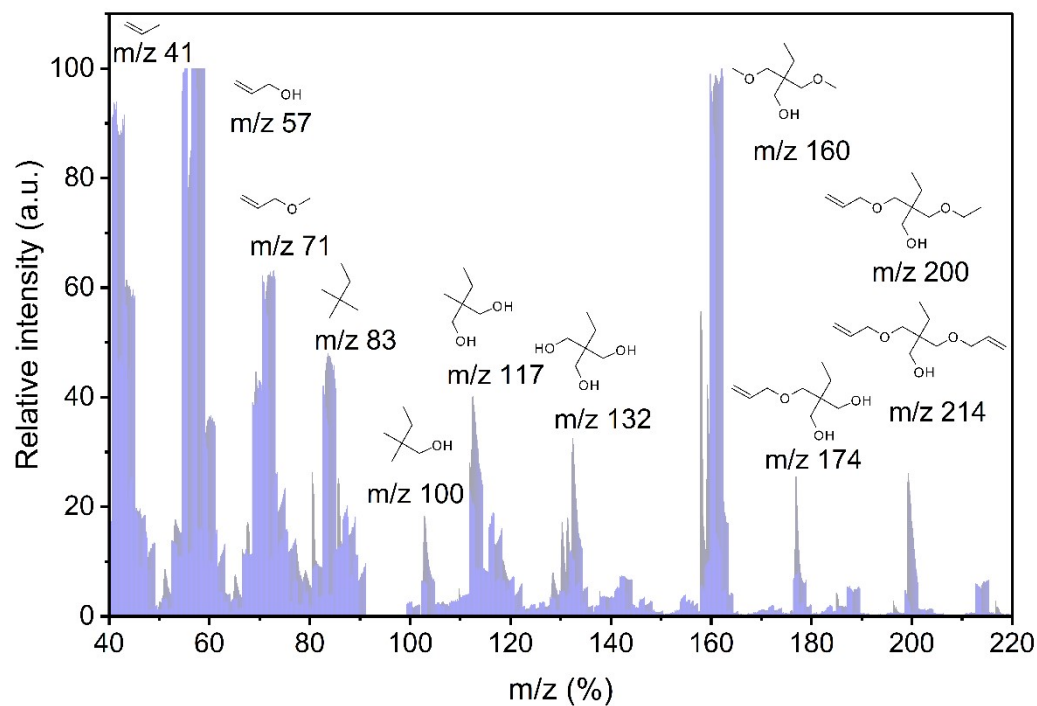

Figure S16 Proposed structures for MS peaks obtained during thermal treatment of the catalysed pristine sample.

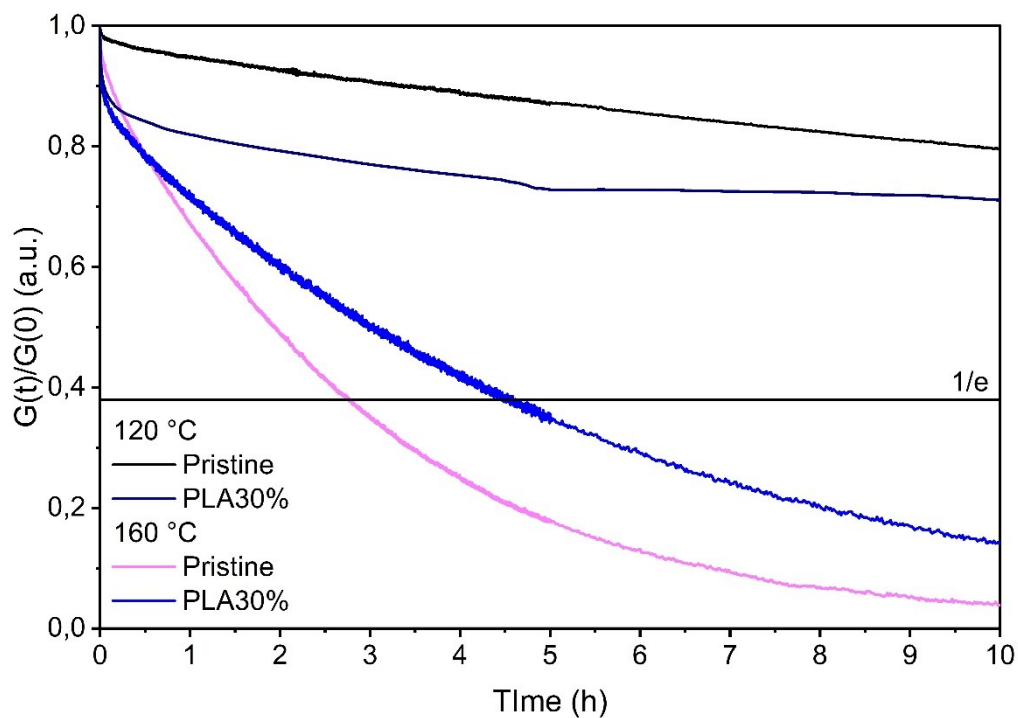

Figure S17 Stress relaxation curve for thermally treated uncatalysed samples at 120°C.

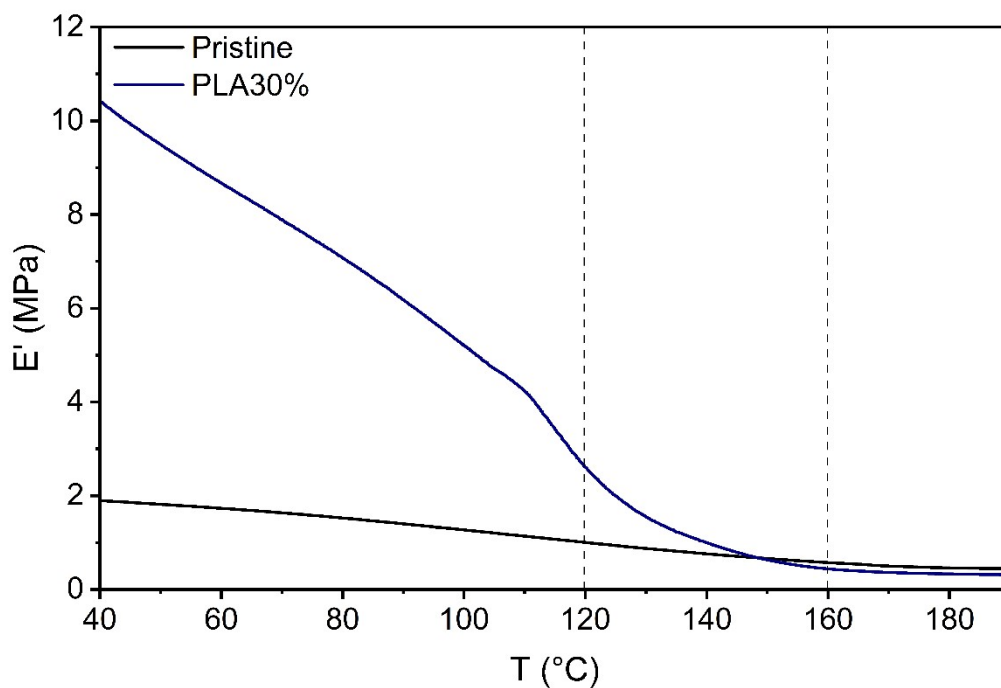

Figure S18 Storage modulus ( $E'$ ) of printed and post-baked samples. The dash lines indicate the temperature range in which stress relaxation tests were conducted.

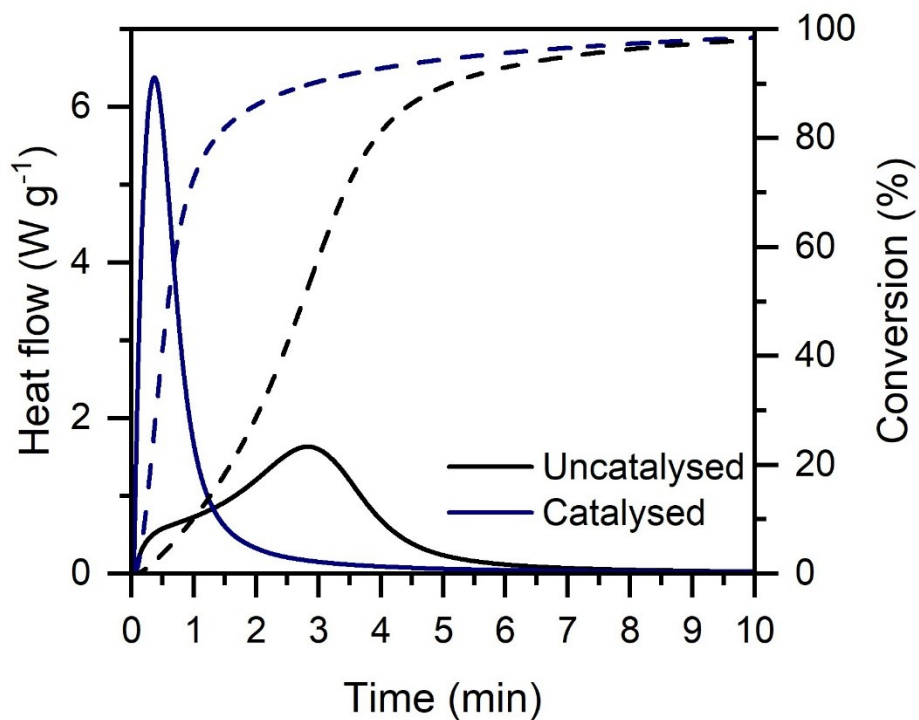

Figure S19 Thermal effect of curing and conversion of monomers based on  $\Delta H$  normalized to the resin including filler obtained from photo-DSC experiments.
